# Supplementary material for: Robust ferromagnetism and Weyl half-semimetal in a two-dimensional vanadium boride monolayer
Source: Royal Society of Chemistry journal article supplement (doi:10.1039/d2nr03236h), 2022-01-01
Supplement: d2nr03236h1.pdf [file d2nr03236h1.pdf]

## Supporting Information

### Robust Ferromagnetism and Weyl Half-Semimetal in Two-Dimensional Vanadium Borides Monolayer

Table S1. Character table for  $C_{2v}$  and  $C_s$  point groups which are adopted from irvsp software.

| $C_{2v}$   | $E$ | $C_{2z}$ | $M_y$ | $M_x$ | $C_s$      | $E$ | $M_y$ |
|------------|-----|----------|-------|-------|------------|-----|-------|
| $\Gamma_1$ | 1   | 1        | 1     | 1     | $\Sigma_1$ | 1   | 1     |
| $\Gamma_2$ | 1   | 1        | -1    | -1    | $\Sigma_2$ | 1   | -1    |
| $\Gamma_3$ | 1   | -1       | -1    | 1     | $\Sigma_3$ | 1   | -i    |
| $\Gamma_4$ | 1   | -1       | 1     | -1    | $\Sigma_4$ | 1   | i     |
| $\Gamma_5$ | 2   | 0        | 0     | 0     |            |     |       |

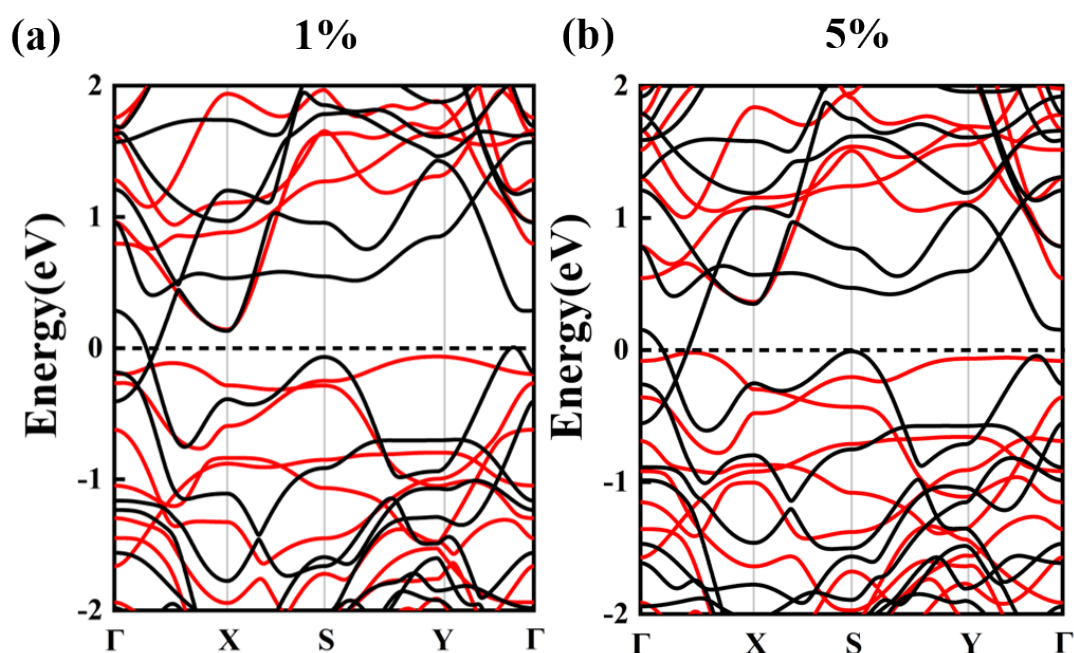

Fig. S1 Band structures of  $VB_{28}$  under (a) 1% and (b) 5% biaxial strains without SOC.

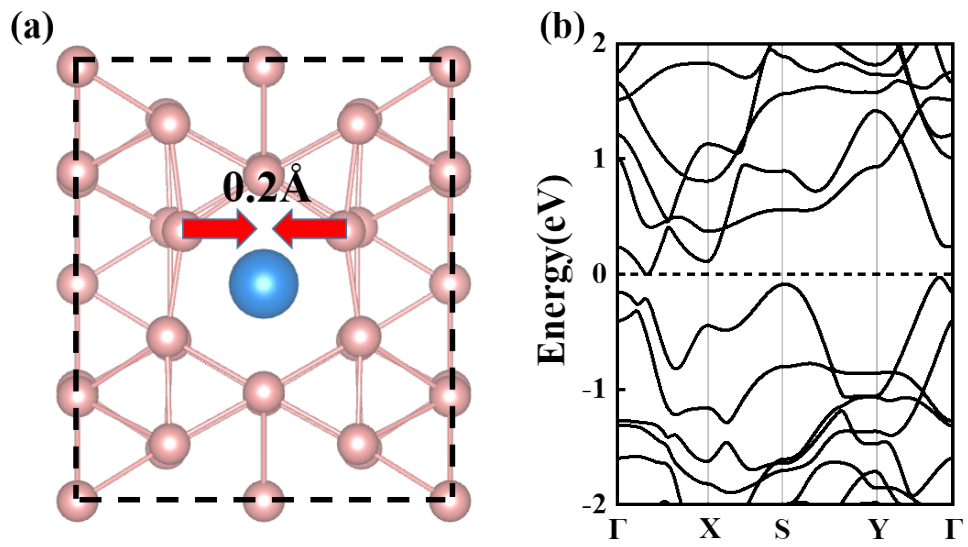

Fig. S2 (a)Top view of the structure with shifting two Born atoms. (b)The band structure of the changed structure in (a).
